# Supplementary material
Source: HighWire-hosted journal article supplement (https://www.cmajopen.ca/highwire/filestream/81101/field_highwire_adjunct_files/1/2016-0136-2-at.pdf)
Supplement: 2016-0136-2-at.pdf [file 2016-0136-2-at.pdf]

**Appendix 2 (as supplied by the authors): *Delirium Assessment***

|       | Shift 1 (i.e. 0700-1500hrs) |          | Shift 2 (i.e. 1500hrs – 2300hrs) |          | Shift 3 (i.e. 2300hrs – 0700hrs) |          |
|-------|-----------------------------|----------|----------------------------------|----------|----------------------------------|----------|
|       | CAM-ICU/ICDSC               | SAS/RASS | CAM-ICU/ICDSC                    | SAS/RASS | CAM-ICU/ICDSC                    | SAS/RASS |
| Day 1 |                             |          |                                  |          |                                  |          |
| Day 2 |                             |          |                                  |          |                                  |          |
| Day 3 |                             |          |                                  |          |                                  |          |
| Day 4 |                             |          |                                  |          |                                  |          |
| Day 5 |                             |          |                                  |          |                                  |          |
| Day 6 |                             |          |                                  |          |                                  |          |
| Day 7 |                             |          |                                  |          |                                  |          |
